# Supplementary material for: Development of Potentiometric Sensors for C2H4 Detection
Source: Sensors (Basel). 2018 Sep 7;18(9):2992. doi: 10.3390/s18092992 (PMC6164524; doi:10.3390/s18092992)
Supplement: Supplementary file 1 [file sensors-18-02992-s001.pdf]

## Supporting information

### Development of potentiometric sensors to $C_2H_4$

F. Toldra-Reig, J.M. Serra

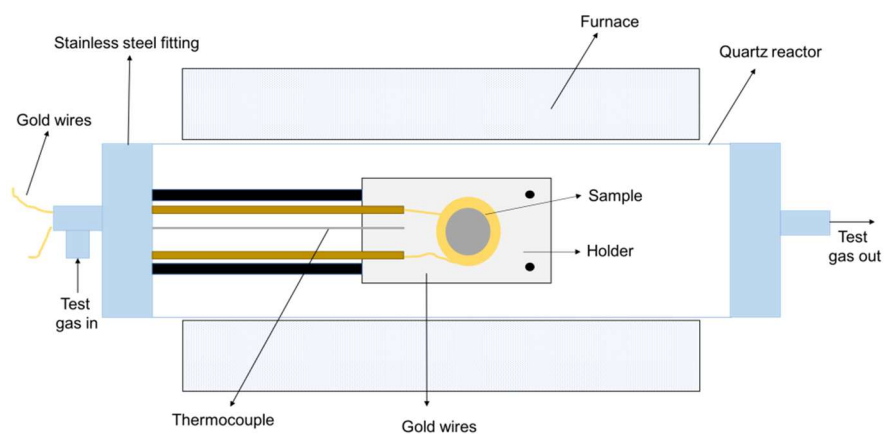

Figure S1 Experimental set-up used to measure sensor response

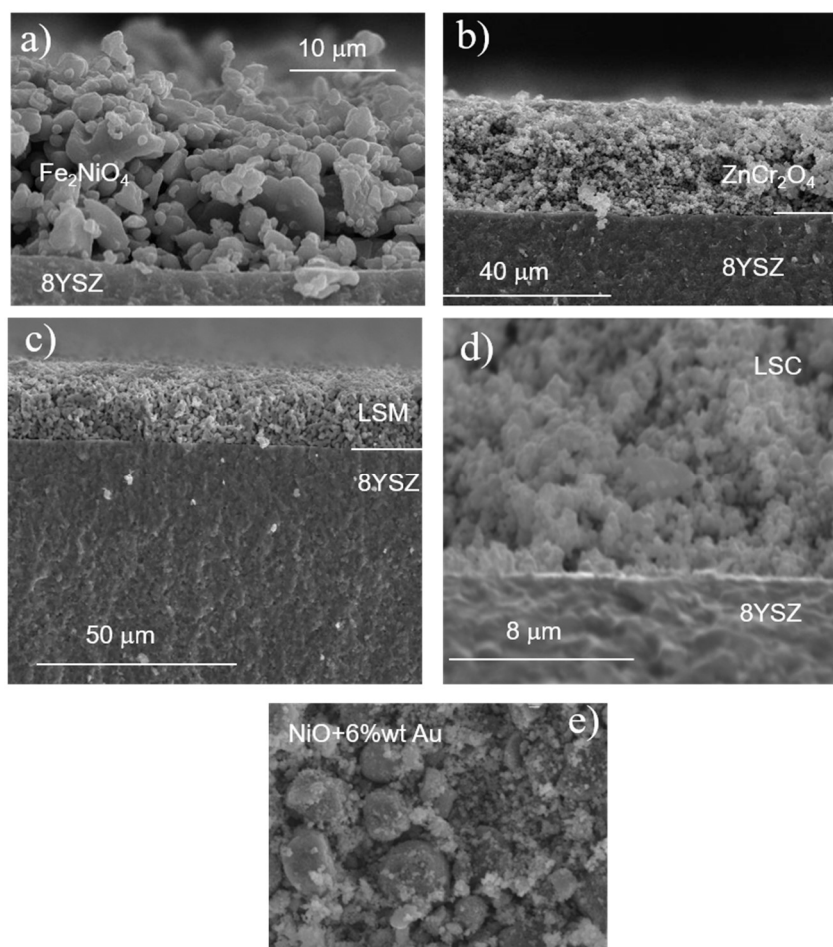

Figure S2 SEM image of the device cross-section showing the interface WE-electrolyte corresponding to a)  $\text{FeNiO}_4$ , b)  $\text{ZnCr}_2\text{O}_4$ , c) LSM and d) LSC. On the other hand, e) shows the  $\text{NiO}+5\%\text{wt Au}$  surface.

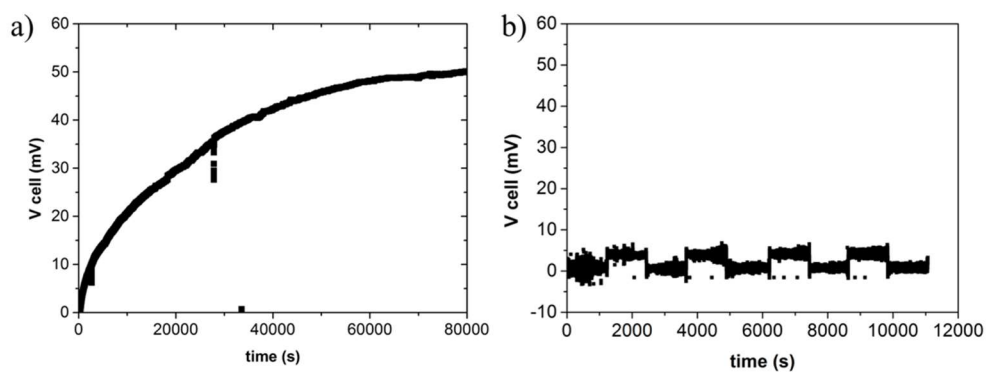

Figure S3 Response curves for changes in concentration of  $ZnCr_2O_4$  with fresh ink and 1 month ink: a) response to 400 ppm  $C_2H_4$  with fresh paste, b) response to changes in concentration from 50 to 200 ppm of  $C_2H_4$ . The sensor consists of  $ZnCr_2O_4$  as WE and Pt as RE and at  $550^\circ C$  with a 6% of  $O_2$  and balanced with Ar. A lower sensor response can be observed after 1 month of paste storage. Thus, the material reproducibility does not fit the requirements about stability and reproducibility with time.

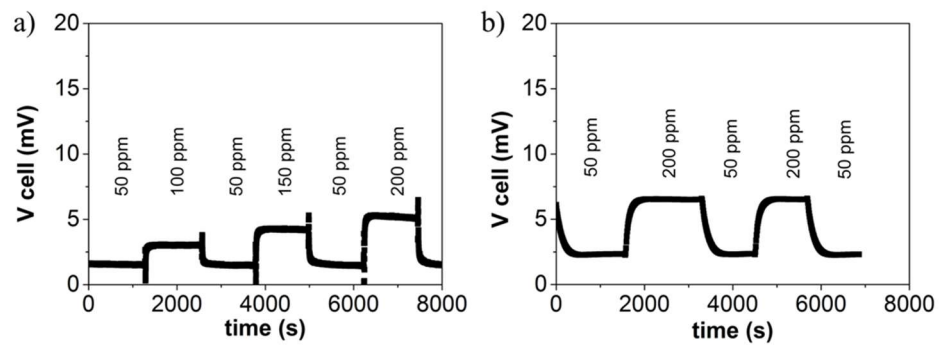

Figure S4 Response transient to  $C_2H_4$  of the sensor employing as WE: a) LSC and b) LSC/8YSZ (1:1 vol.)

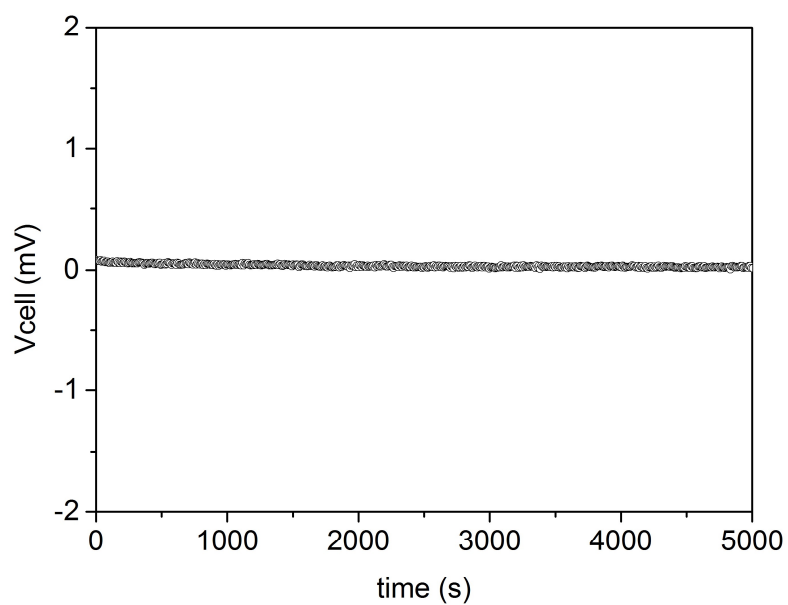

Figure S5 Sensor baseline when exposed to 6% of O<sub>2</sub> balanced with argon at 550 °C. The sensor consists of Fe<sub>0.7</sub>Cr<sub>1.3</sub>O<sub>3</sub>/8YSZ as WE and Pt as RE
